# Supplementary material for: A novel dual response ratiometric fluorescent probe for the determination of H2O2 and glucose via etching of silver nanoparticles
Source: Royal Society of Chemistry journal article supplement (doi:10.1039/c8an02019a), 2018-11-21
Supplement: c8an02019a1.pdf [file c8an02019a1.pdf]

## Supporting Information

### **Novel Dual Response Ratiometric Fluorescence Probe for Determination of H<sub>2</sub>O<sub>2</sub> and Glucose *via* Etching of Silver Nanoparticles**

Hongzhi Lu<sup>a</sup>, Chunwei Yu<sup>b</sup>, Shuai Quan<sup>c</sup>, Shoufang Xu<sup>c\*</sup>,

<sup>a</sup> School of Chemistry and Chemical Engineering, Linyi University, Linyi 276005, China

<sup>b</sup> Laboratory of Environmental Monitoring, School of Tropical and Laboratory Medicine, Hainan  
Medical University, Haikou 571101, China

<sup>c</sup> School of Materials Science and Engineering, Linyi University, Linyi 276005, China

\* Corresponding author, E-mail shfxu1981@163.com

## 1. The interaction of CDs, Ag NPs, silver ions and H<sub>2</sub>O<sub>2</sub>

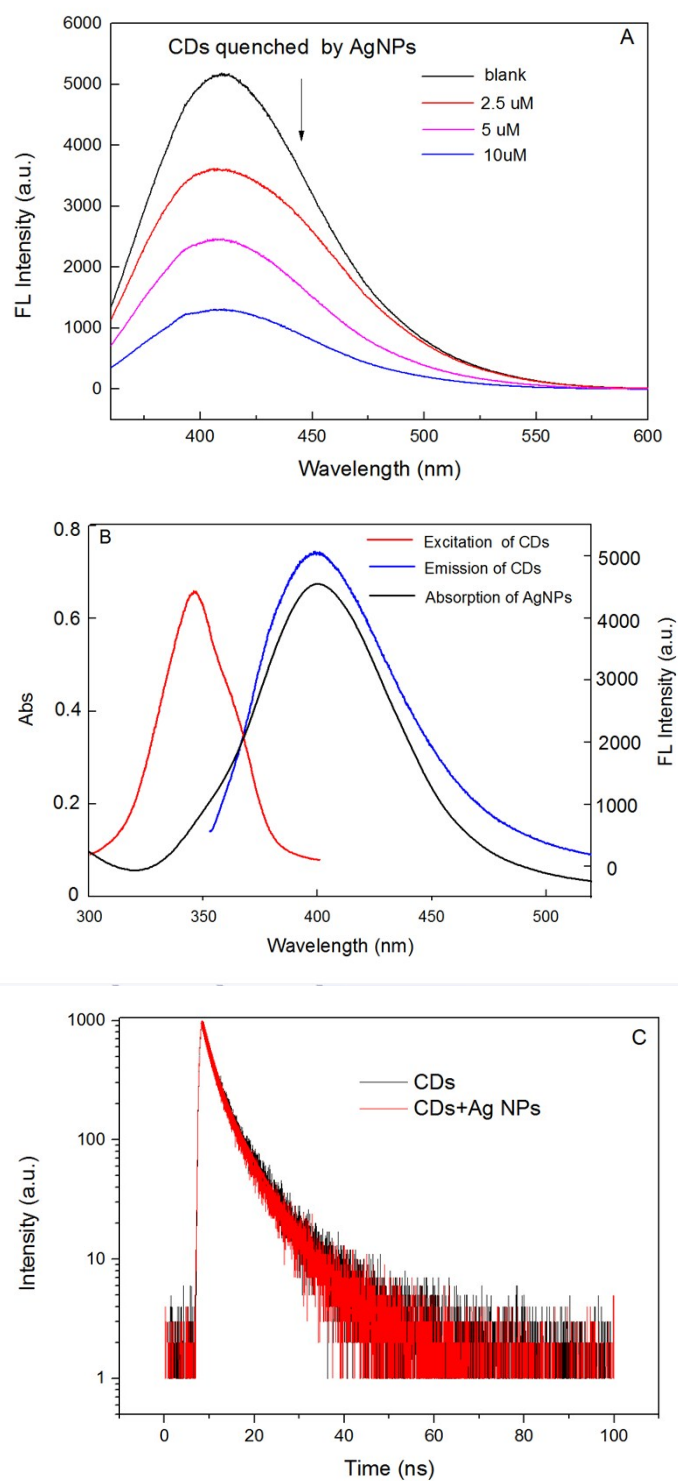

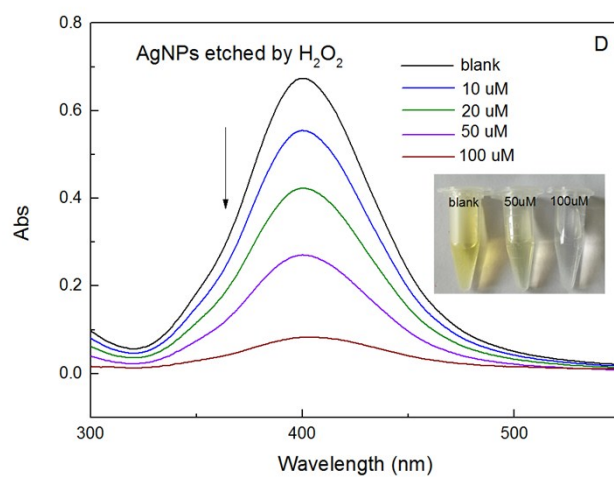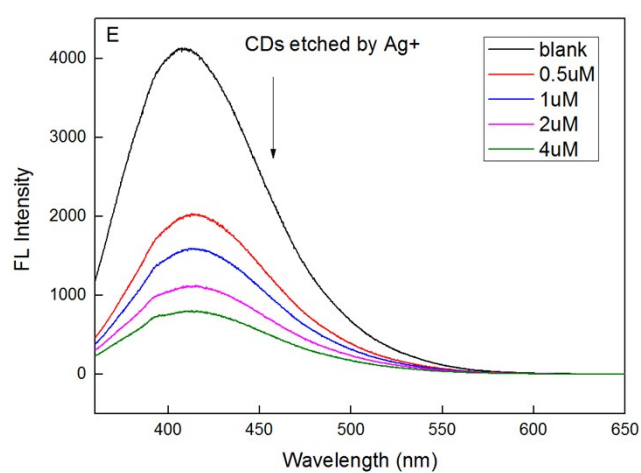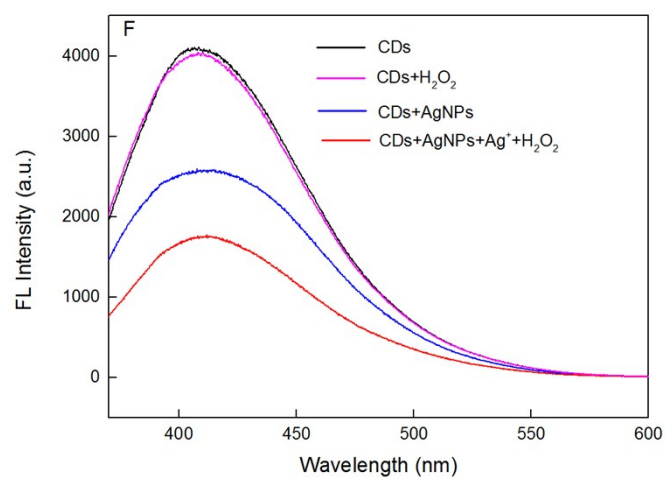

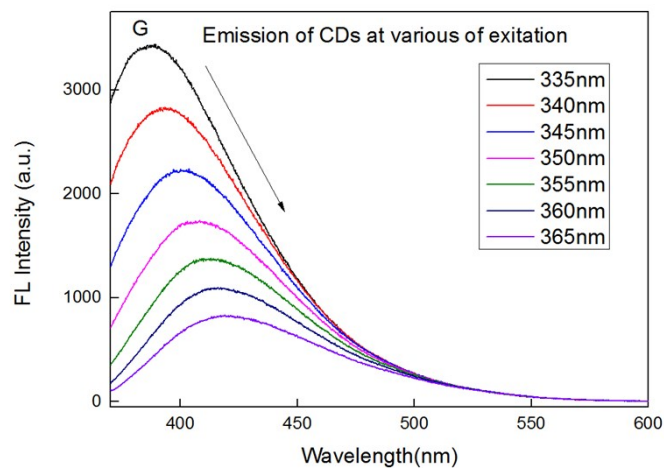

Figure S 1. (A) Fluorescence titrations of the CDs ( $10 \mu\text{g}\cdot\text{mL}^{-1}$ ) with AgNP from 2.5 to  $10\mu\text{M}$ .  
 (B) UV–vis absorption spectra of AgNPs and FL excitation and FL emission spectra of CDs.  
 (C) The fluorescence lifetime of CDs before and after addition of Ag NPs.  
 (D) UV–vis absorption spectra of AgNPs in the presence of  $\text{H}_2\text{O}_2$  from 0 to  $100 \mu\text{mol L}^{-1}$ .  
 (E) Fluorescence titrations of the CDs ( $10 \mu\text{g}\cdot\text{mL}^{-1}$ ) with  $\text{Ag}^+$  from 0.5 to  $4.0 \mu\text{M}$ .  
 (F) The effect of  $\text{H}_2\text{O}_2$ , AgNPs, and  $\text{Ag}^+$  on the FL intensity of CDs.  
 (G) FL emission spectra of the CDs recorded at various excitation wavelengths in the range of 335–365 nm.

## 2. The interaction of QDs, Ag NPs, silver ions and H<sub>2</sub>O<sub>2</sub>

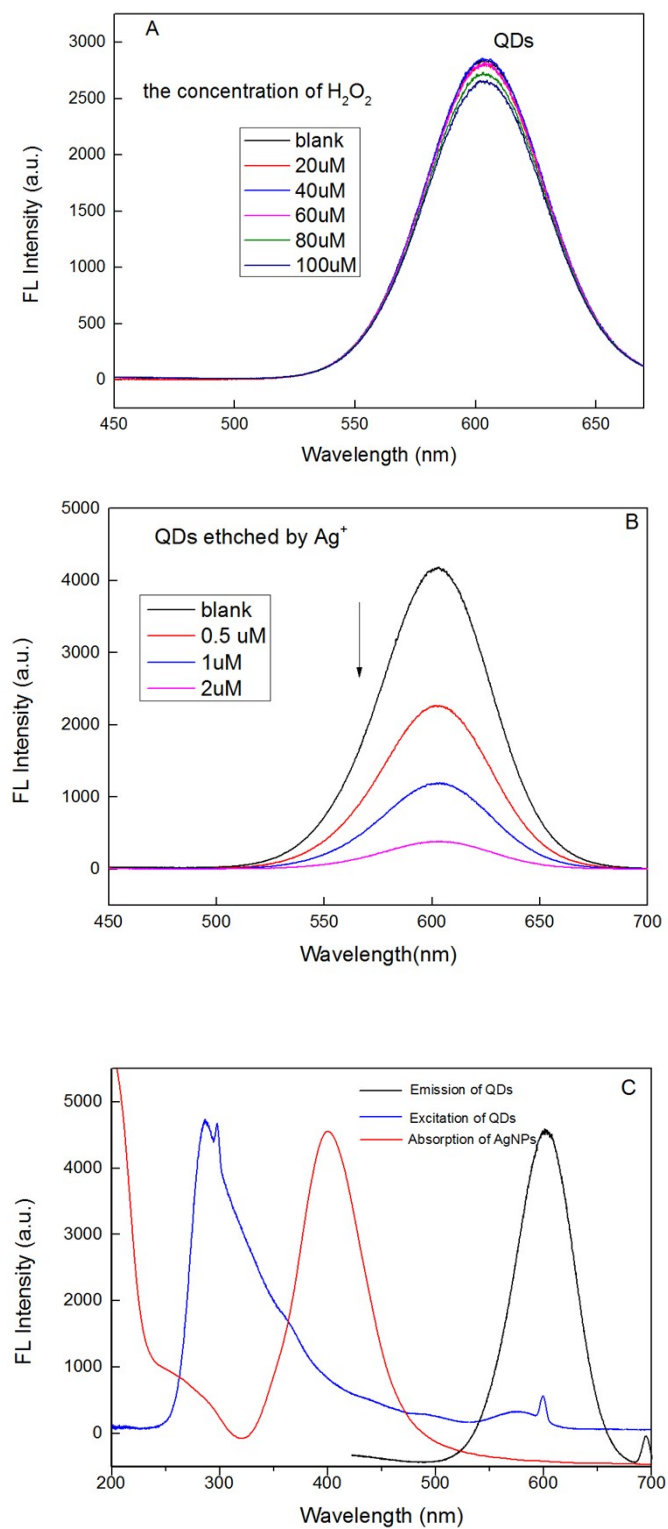

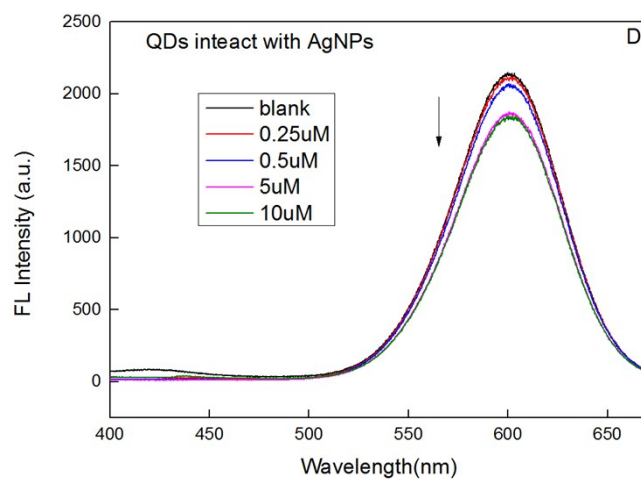

Figure S 2. (A) The effect of  $\text{H}_2\text{O}_2$  on the FL intensity of QDs.

(B) Fluorescence titrations of the QDs ( $20 \mu\text{g}\cdot\text{mL}^{-1}$ ) with  $\text{Ag}^+$  from 0.5 to 2.0  $\mu\text{M}$ .

(C) UV-vis absorption spectra of AgNPs and FL excitation and FL emission spectra of QDs.

(D) Fluorescence titrations of the QDs ( $10 \mu\text{g}\cdot\text{mL}^{-1}$ ) with AgNP from 0.25 to 10  $\mu\text{M}$ .

### 3. TEM images of samples.

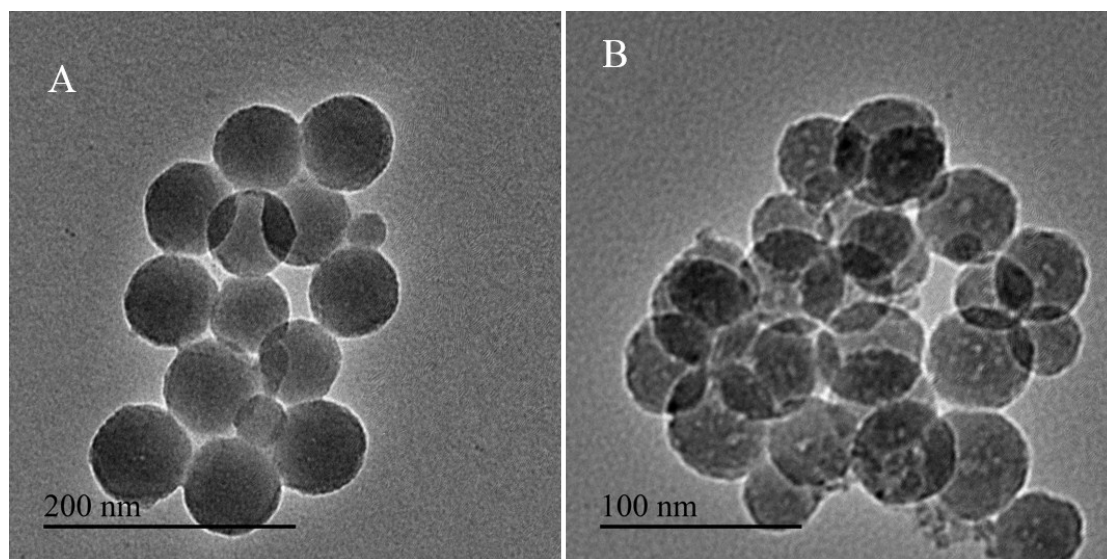

Figure S3 The TEM images of CDs@SiO<sub>2</sub> (A) and CDs@SiO<sub>2</sub>@QDs (B).

#### 4. The stability of D-RFP

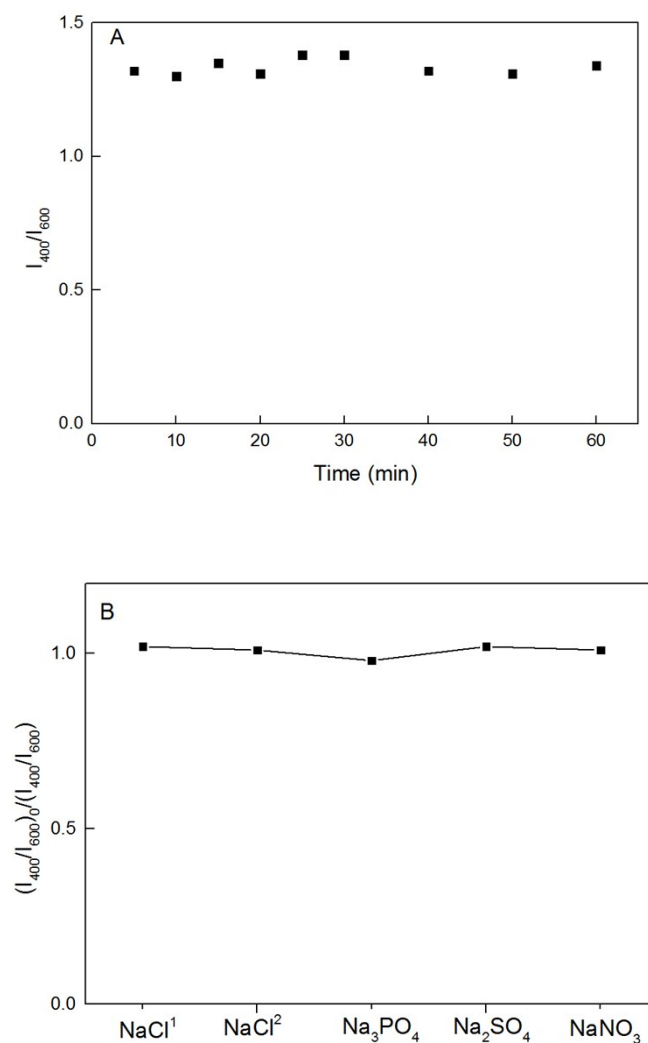

Figure S4 (A) Stability of the FL intensity of the ratiometric. The change of the relative intensity is not significant ( $< 5\%$ ) in 1h.

(B) The tolerance of the D-RFP to various anions (sodium salt) in phosphate buffer (pH=7.4, 10 mM). The fluorescence intensity ratio maintains nearly stable before and after the addition of various anions (10 mM) ( $\text{NaCl}^1$  10 mM,  $\text{NaCl}^2$  20 mM).

$(I_{400}/I_{600})_0$  and  $(I_{400}/I_{600})$  represents the ratiometric signal before and after the anion addition, respectively.



## 5. Optimization of reaction conditions for H<sub>2</sub>O<sub>2</sub> detection

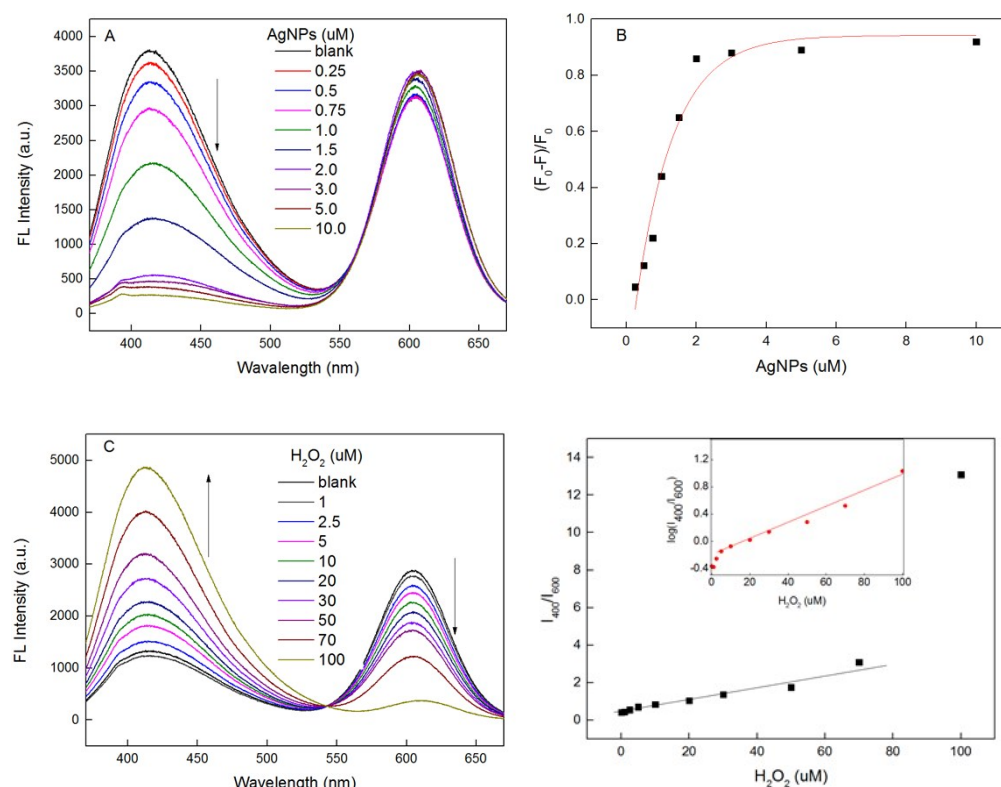

Figure S5 (A) Fluorescence titrations of the D-RFP (50 μg·mL<sup>-1</sup>) with Ag NPs from 0.25 to 10 μM.

(B) Quenching efficiency of D-RFP (50 μg·mL<sup>-1</sup>) versus the concentration Ag NPs at 400 nm.

(C) Fluorescence response of D-RFP and Ag NPs (50 μg·mL<sup>-1</sup> and 3 μM, respectively) in the presence of different concentration of H<sub>2</sub>O<sub>2</sub>.

(D) The relationship between ratio of fluorescence intensity of the D-RFP in (C) versus concentration of H<sub>2</sub>O<sub>2</sub>.

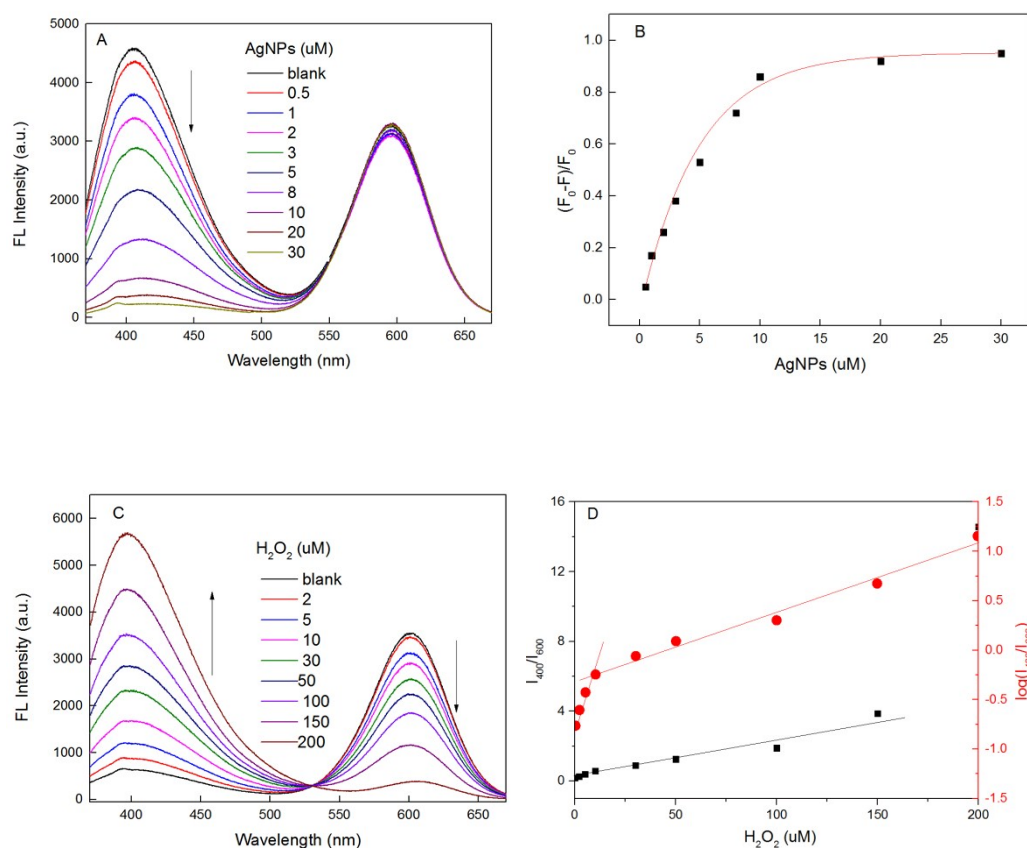

Figure S6 (A) Fluorescence titrations of the D-RFP (100  $\mu\text{g}\cdot\text{mL}^{-1}$ ) with Ag NPs from 0.5 to 30  $\mu\text{M}$ .

(B) Quenching efficiency of D-RFP (100  $\mu\text{g}\cdot\text{mL}^{-1}$ ) versus the concentration Ag NPs at 400 nm.

(C) Fluorescence response of D-RFP and Ag NPs (100  $\mu\text{g}\cdot\text{mL}^{-1}$  and 10  $\mu\text{M}$ , respectively) in the presence of different concentration of H<sub>2</sub>O<sub>2</sub>.

(D) The relationship between ratio of fluorescence intensity of the D-RFP in (C) versus concentration of H<sub>2</sub>O<sub>2</sub>.

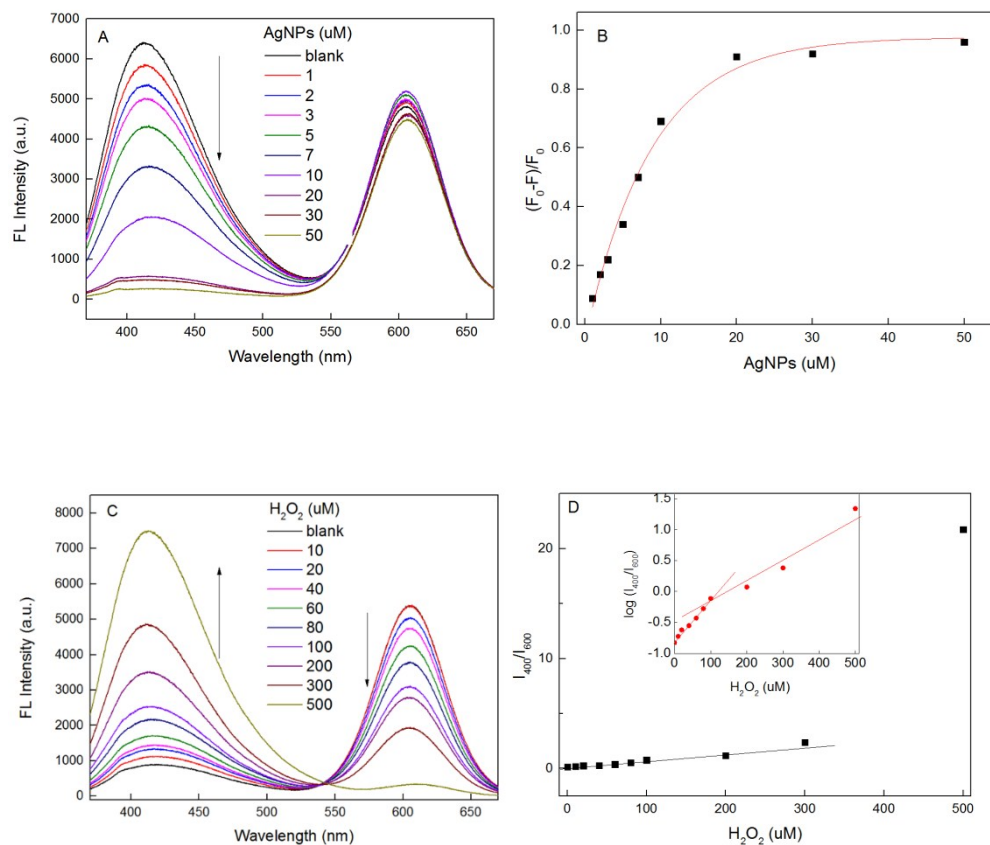

Figure S7 (A) Fluorescence titrations of the D-RFP ( $150 \mu\text{g}\cdot\text{mL}^{-1}$ ) with Ag NPs from 1 to 50  $\mu\text{M}$ .  
 (B) Quenching efficiency of D-RFP ( $150 \mu\text{g}\cdot\text{mL}^{-1}$ ) versus the concentration Ag NPs at 400 nm.  
 (C) Fluorescence response of D-RFP and Ag NPs ( $150 \mu\text{g}\cdot\text{mL}^{-1}$  and 20  $\mu\text{M}$ , respectively) in the presence of different concentration of  $\text{H}_2\text{O}_2$ .  
 (D) The relationship between ratio of fluorescence intensity of the D-RFP in (C) versus concentration of  $\text{H}_2\text{O}_2$ .

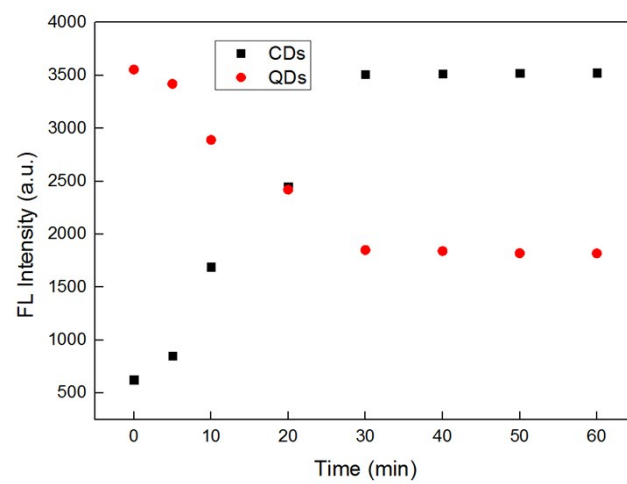

Figure S8 The reaction time on the FL intensity of CDs and QDs.

## 6. Optimization of reaction conditions for glucose detection

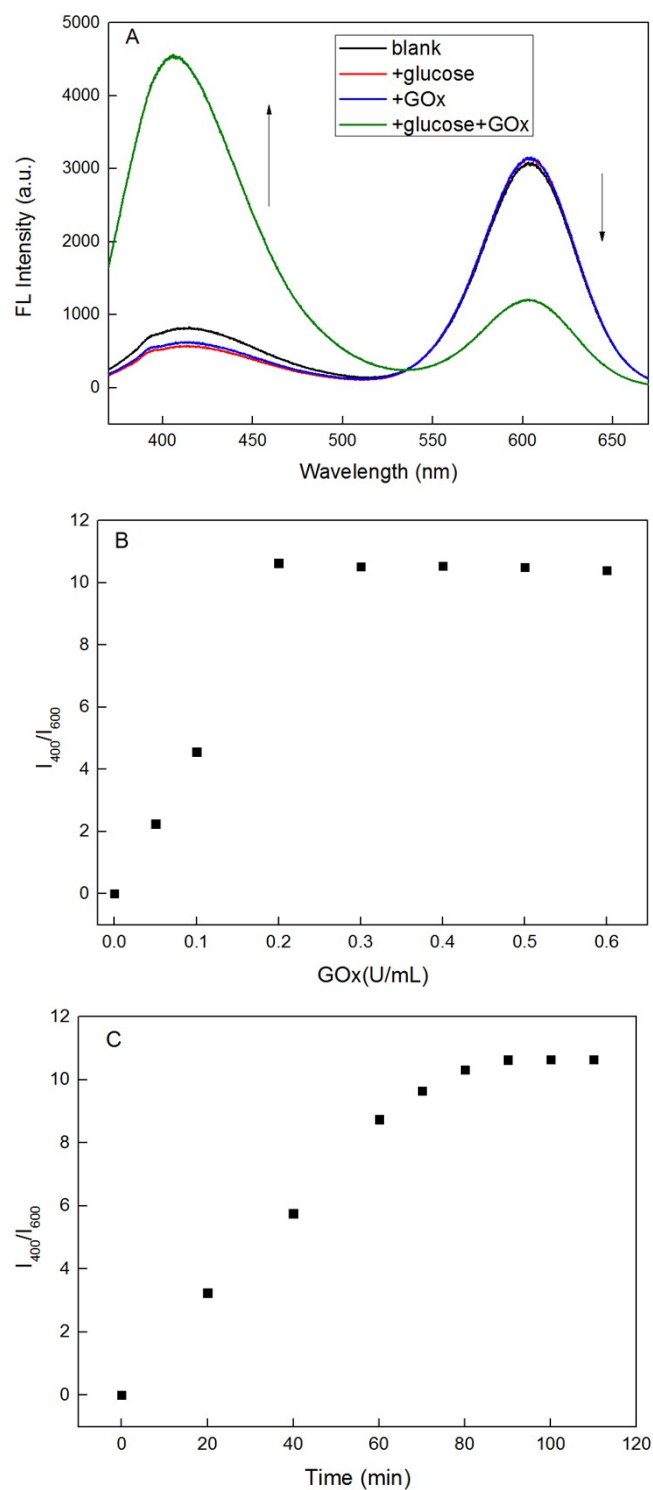

Figure S 9 (A) The fluorescence spectrum of D-RFP with glucose, GluOx, glucose and GluOx. B) Fluorescence responses of the sensing system toward 500  $\mu$ M glucose addition at different amount of GluOx. (C) The reaction time of GluOx and glucose on the ratio of FL intensity of D-RFP.

## 7. Comparison of our method and other fluorescence methods

**Table S1** Comparison of sensitivity of our method to other fluorescence methods for glucose detection.

| Probe                                              | Method             | $H_2O_2$     |             | Glucose      |             | Reference |
|----------------------------------------------------|--------------------|--------------|-------------|--------------|-------------|-----------|
|                                                    |                    | Linear range | LOD         | Linear range | LOD         |           |
|                                                    |                    | ( $\mu M$ )  | ( $\mu M$ ) | ( $\mu M$ )  | ( $\mu M$ ) |           |
| Rox-DNA Functionalized CdZnTeS QDs                 | RFP                | 0.33-50      | 0.075       | 2-100        | 0.045       | 1         |
| AgNP-DNA@GQDs Hybrid                               | Single fluorescent | 0.4-200      | 0.10        | 2-100        | 0.42        | 2         |
| CDs/AgNPs Hybrid                                   | Single fluorescent | 10-100       | --          | 2-100        | 1.39        | 3         |
| dsDNA-CuNPs and DNA<br>intercalator (SYBR Green I) | RFP                | 12.5-500     | 2.6         | 20-400       | 8.5         | 4         |
| DNA-AgNPs/UCNP nanocomposite                       | Single fluorescent | 2-80         | 1.08        | 2.5-100      | 1.41        | 5         |
| CDs/AgNPs Hybrid                                   | Single fluorescent | 1.0-100      | --          | 50-300       | 1.0         | 6         |
| perylene probe/ AgNPs Hybrid                       | Single fluorescent | --           | --          | 0-200        | 2.5         | 7         |
| CDs@QDs/ AgNPs Hybrid                              | RFP                | 1-150        | 0.28        | 2-200        | 0.59        | This work |

## 8. Clinical sample detection

Table S2 The determination of glucose in human serum from diabetics and healthy individuals

| Sample                | Healthy person |     |     | Diabetes patient |      |      |
|-----------------------|----------------|-----|-----|------------------|------|------|
|                       | (mM)           |     |     | (mM)             |      |      |
|                       | H1             | H2  | H3  | D1               | D2   | D3   |
| <b>This method</b>    | 4.2            | 3.9 | 4.4 | 13.2             | 12.8 | 14.1 |
| <b>Commercial kit</b> | 4.3            | 3.8 | 4.4 | 13.4             | 12.9 | 13.9 |

Table S 3 The recovery of spiked glucose in diluted human serum samples. The standard deviation of each sample was obtained by three measurements

| Sample   | Detected          | Added             | Detected          | Recovery | RSD |
|----------|-------------------|-------------------|-------------------|----------|-----|
|          | ( $\mu\text{M}$ ) | ( $\mu\text{M}$ ) | ( $\mu\text{M}$ ) | (%)      | (%) |
| <b>1</b> | 19.50             | 20.00             | 40.12             | 101.5    | 3.4 |
| <b>2</b> | 19.50             | 50.00             | 69.24             | 99.6     | 2.6 |
| <b>3</b> | 19.50             | 100.00            | 116.4             | 97.4     | 4.7 |

## 9. Reference

(1) Mao, G.; Cai, Q.; Wang, F.; Luo, C.; Ji, X.; He, Z.; *Anal. Chem.* **2017**, *89*, 11628-11635.

(2) Wang, Li.; Zheng, J.; Li, Y.; Yang, S.; Liu, C.; Xiao, Y.; Li, J.; Cao, Z.; Yang, R.; *Anal. Chem.* **2014**, *86*, 12348-12354.

(3) Ma, J.; Yin, B.; Wu, X.; Ye, B.; *Anal. Chem.* **2017**, *89*, 1323-1328.

(4) Chen, J.; Ji, X.; He, Z.; *Anal. Chem.* **2017**, *89*, 3988-3995.

- (5) Wu, S.; Kong, X.; Cen, Y.; Yuan, J.; Yu, R.; Chu, X.; *Nanoscale* **2016**, *8*, 8939-8946.
- (6) Li, H.; Yan, X.; Qiao, S.; Lu, G.; Su, X.; *ACS Appl. Mater. Interfaces* **2018**, *10*, 7737-7744.
- (7) Li, J.; Li, Y.; Chen, J.; Chen, Y.; Wang, Y.; Yang, M.; Yu, C.; *Chem. Commun.* **2015**, *51*, 6354-6356.
